# Supplementary material
Source: publisher figshare collection journal article supplement (https://acs.figshare.com/ndownloader/files/4541602)
Supplement: Supplementary file 1 [file 4541602]

# In-situ Observation of Tensile Deformation Processes of soft colloidal crystalline latex fibers

Jianqi Zhang<sup>1</sup>, Shanshan Hu<sup>1</sup>, Jens Rieger<sup>2</sup>, Stephan V. Roth<sup>3</sup>, Rainer Gehrke<sup>3</sup> and Yongfeng Men<sup>1,\*</sup>

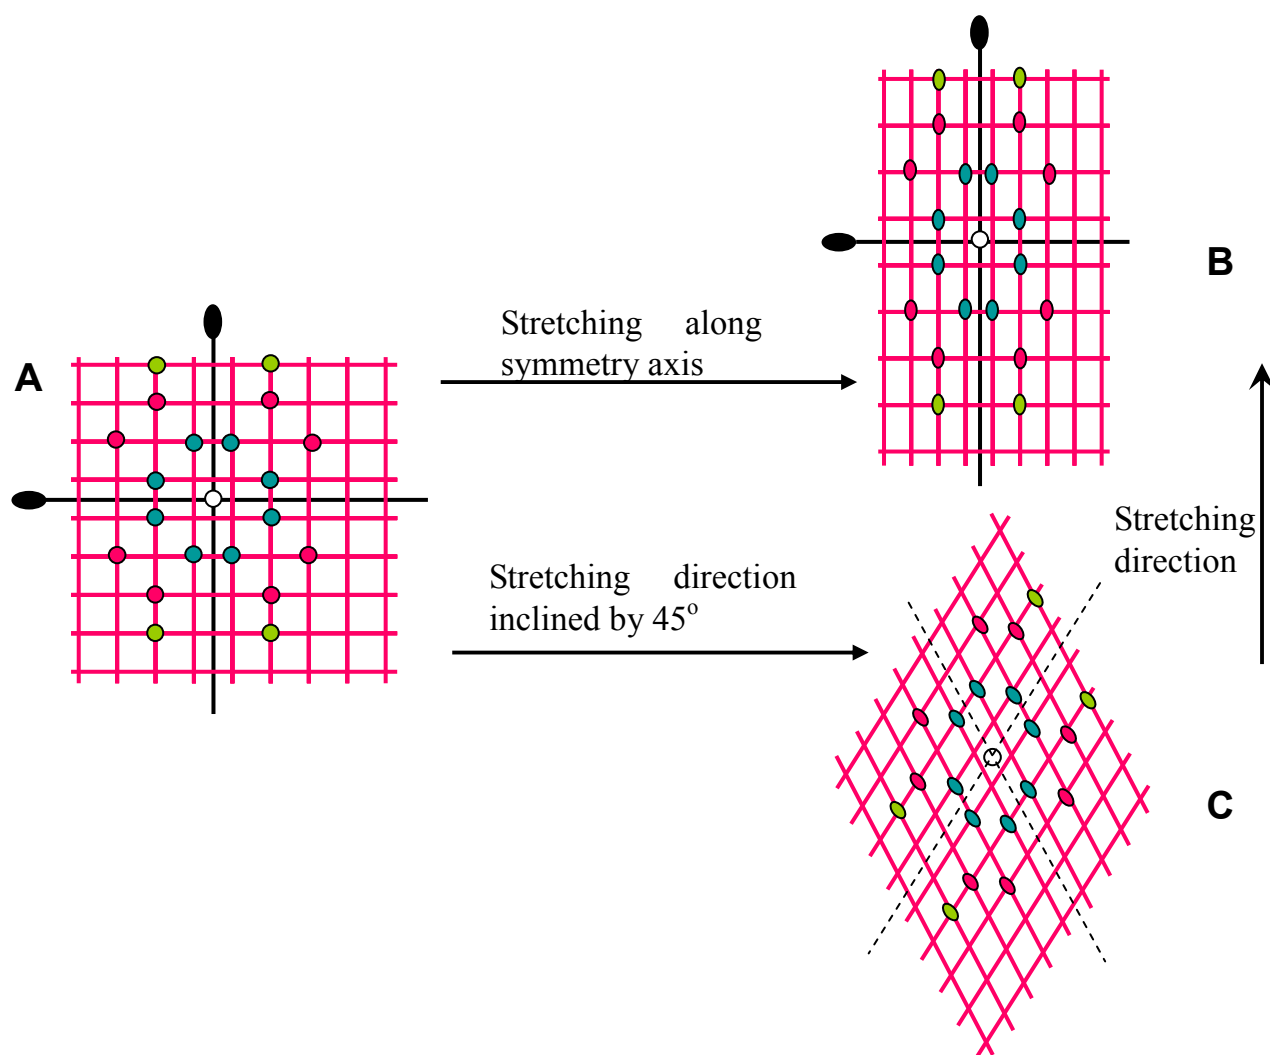

Figure S1. Sketches showing the preservation and loss of axisymmetry of a scattering pattern after being stretched along different directions with respect to the symmetry axis. (A) Before deformation, black lines denote the symmetry axes being perpendicular to each other in this case. (B) After being stretched along one of symmetry axes, the scattering pattern remains its axisymmetric and centrosymmetric feature. (C) After being rotated for  $45^\circ$  and stretched along vertical direction. Previous symmetric axes are also included in the sketch as dashed lines. Loss of the axisymmetric feature and the preservation of the centrosymmetry in (C) are clearly seen.
